# Supplementary material for: Syntheses and supramolecular associations of block and grafted phosphonated- and sulfoned-silicone copolymers
Source: Royal Society of Chemistry journal article supplement (doi:10.1039/d4py00628c), 2024-01-01
Supplement: d4py00628c1.pdf [file d4py00628c1.pdf]

## Supporting information for

# Syntheses and Supramolecular Associations of Block and Grafted Phosphonated- and Sulfoned-Silicone Copolymers

By Emmanuel Pouget, Erlea Holgado Garcia, Sergei V. Kostjuk, Irina V. Vasilenko, Claire Longuet, Patrice Lucas, Christine Joly-Duhamel and François Ganachaud

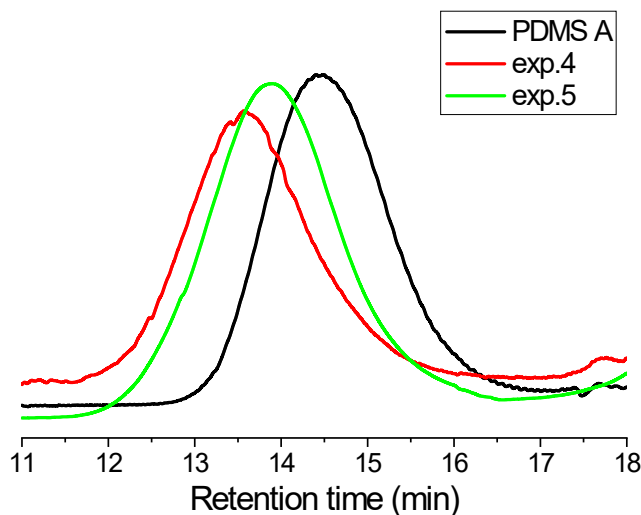

**Figure S1.** SEC curves of product of the reaction of telechelic PDMS A with DEVP. For experimental details see Table 1 in the main text.

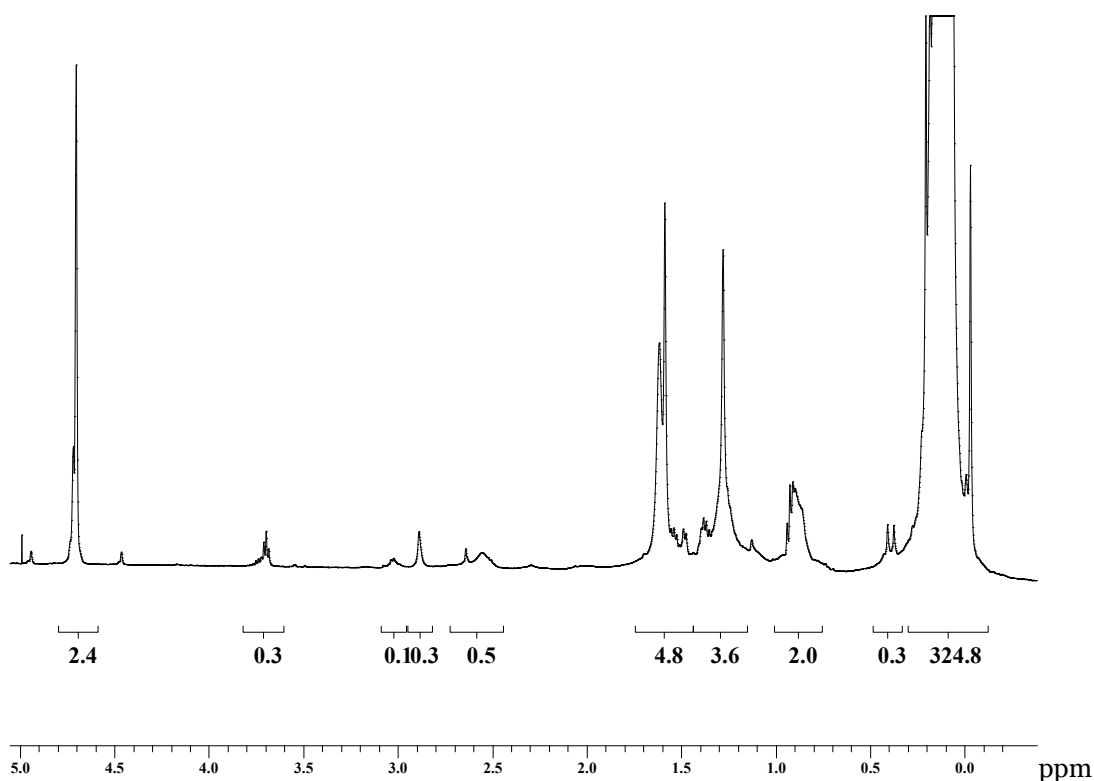

**Figure S2.** <sup>1</sup>H HR-MAS NMR spectrum of MVS-functionalized PDMS C (not shown in Table S3 since characterization were not possible, described in patent, see main text reference [37]). The peak at 4.5 ppm shows the content of SiH that did not react (here 50% conversion). Peaks at 2.9, 2.6, 1.5 and 0.4 ppm are representative of oligoMVS functionalization but their integration were not possible in such an ill-defined spectrum.

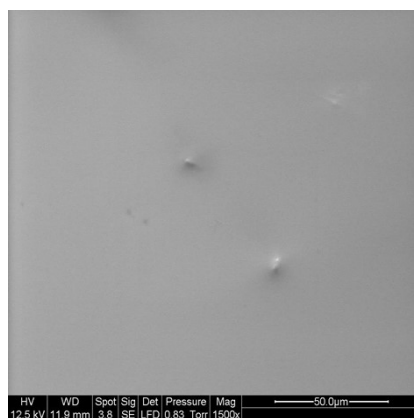

**Figure S3.** ESEM photo of MVS-functionalized block copolymer (Run 8, Table S3).

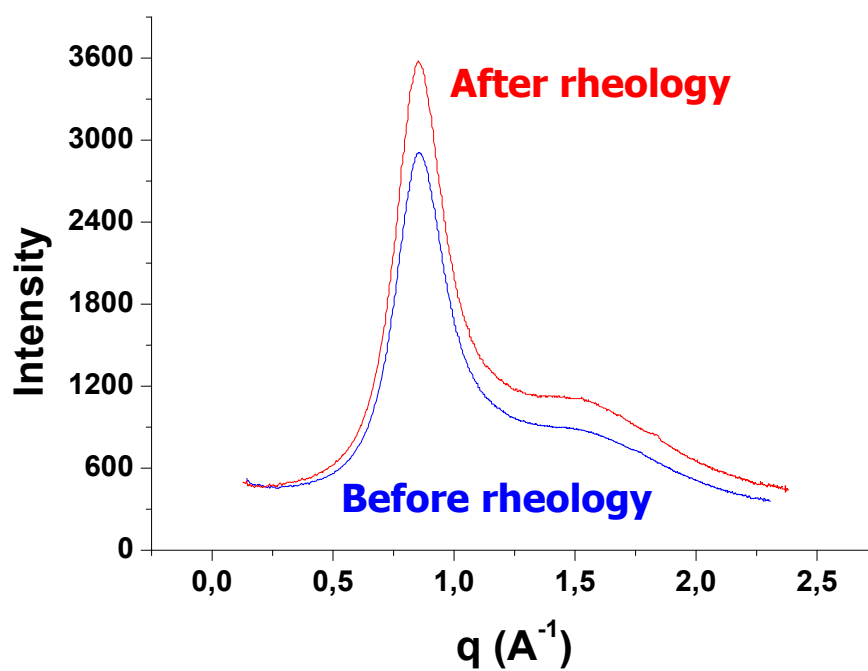

**Figure S4:** X-ray diffraction of the sulfoned PDMS (run 11, table S4) before and after rheology analysis.

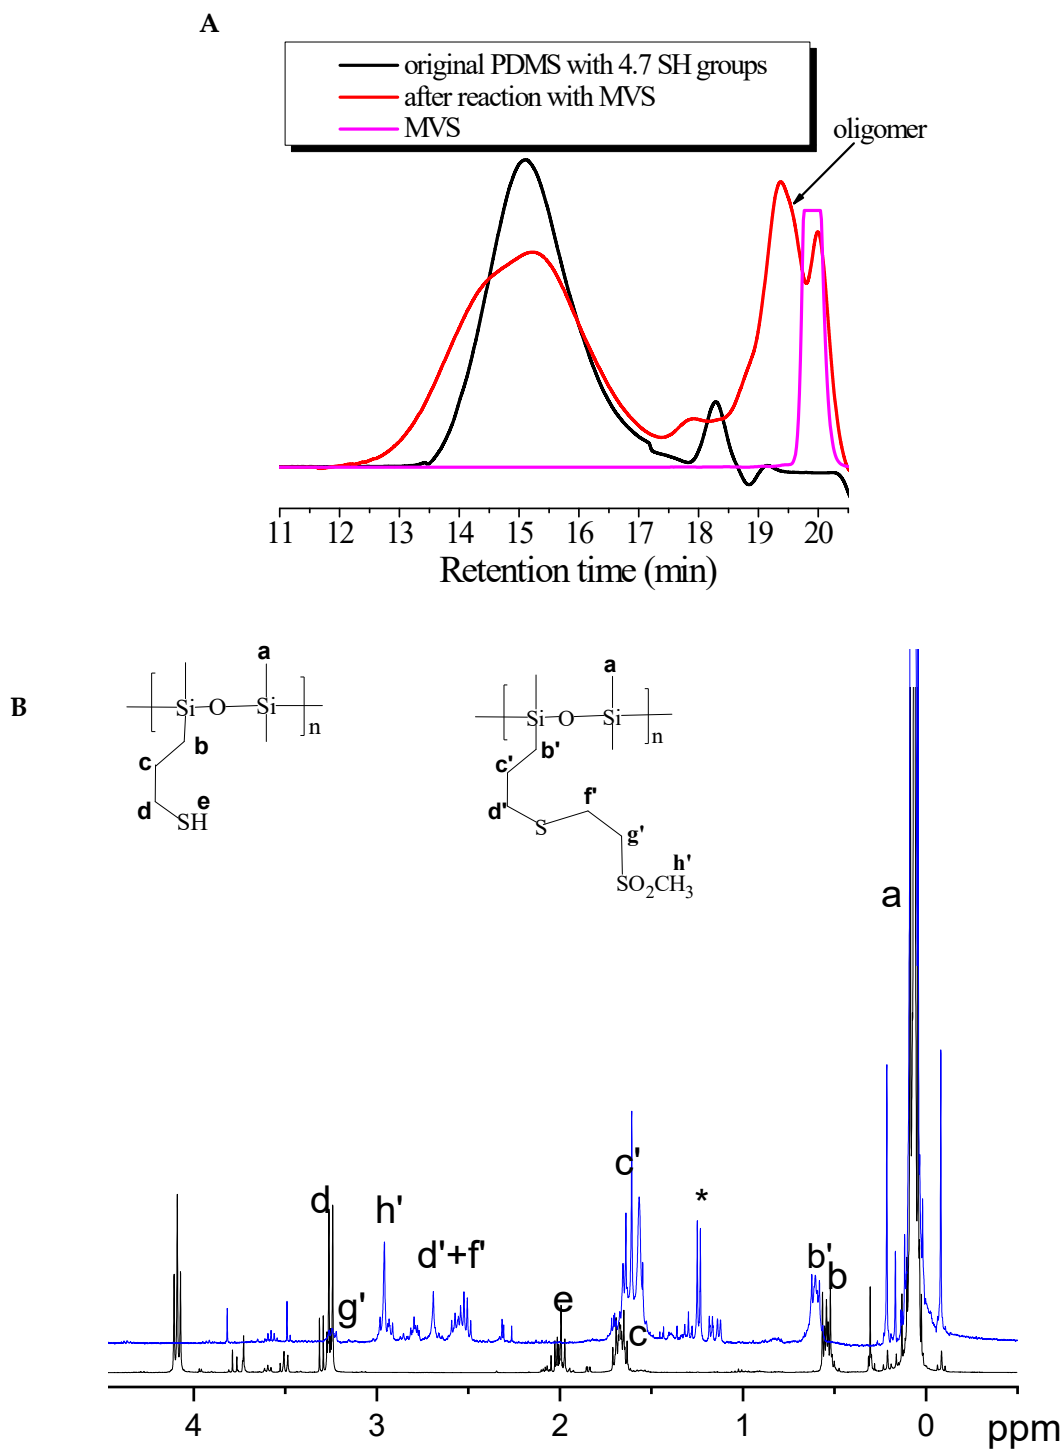

**Figure S5.** (A) SEC curves of product of the thiol-ene monoaddition of MVS on 4-6% mercaptopropylmethyl siloxane-dimethylsiloxane copolymer. (B) corresponding full <sup>1</sup>H NMR spectra of this copolymer (blue) and pristine PDMS (black). Peak of SH (*e* at 2 ppm) has disappeared whereas the methyl attached to the sulfone group make a strong sharp peak (*h'* around 3 ppm). Assignments are based on the paper of Opris et al (see ref<sup>25</sup> in the main text) and ACD NMR simulation.
